# Supplementary material for: 2022 EULAR recommendations for screening and prophylaxis of chronic and opportunistic infections in adults with autoimmune inflammatory rheumatic diseases
Source: HighWire-hosted journal article supplement (doi:10.1136/ard-2022-223335), 2022-11-03
Supplement: ard-2022-223335supp001_data_supplement.pdf [file ard-2022-223335supp001_data_supplement.pdf]

## **Supplementary material 1**

### **Research Questions used in the systemic literature review informing this set of recommendations**

*Research question 1:* Which opportunistic and chronic infections in people with AIIRD can and should we screen for?

*Research question 2:* What screening and prophylaxis can we use and does it work? The following PICO structure was agreed: P - People with AIIRD, I – Immunosuppression/immunomodulation (including steroids), C - People with AIIRD not on immunosuppression, O1 - screening and prophylaxis, O2 - effectiveness of screening and prophylaxis.

### **Pathogens that were included in the systemic literature review informing this set of recommendations**

Mycobacterium tuberculosis complex

Non-tuberculous mycobacteria

Hepatitis B virus

Hepatitis C virus

Hepatitis D virus

Hepatitis E virus

Human immunodeficiency virus

Varicella zoster virus

Herpes simplex virus

Human Herpes Virus 8

*Pneumocystis jirovecii*

Human papilloma virus

*Leishmania* spp.

*Strongyloides stercoralis*

Histoplasma

*Toxoplasma gondii*

*Trypanosoma cruzi*

Cytomegalovirus  
Epstein-Barr virus  
West Nile virus  
*Cryptosporidium*  
*Actinomyces* spp.  
*Bartonella* spp.  
*Campylobacter* spp.  
*Legionella* spp.  
*Leptospira* spp.  
*Listeria* spp.  
*Salmonella* spp.  
*Shigella* spp.  
*Treponema pallidum*  
*Nocardia* spp.  
*Aspergillus* spp.  
*Coccidioides* spp.  
*Candida* spp.  
JC virus  
*Isospora* spp.  
*Wuchereria bancrofti*  
*Loa loa*  
*Onchocerca* spp.  
*Enterobius vermicularis*  
*Ascaris* spp.  
*Schistosoma* spp.  
*Fasciola* spp.  
*Paragonimus* spp.  
*Taenia* spp.  
*Echinococcus* spp.  
*Entamoeba* spp.  
*Gardia lamblia*

*Cryptosporidium* spp.

*Toxocara* spp.

*Trichinella spiralis*

*Chlamydia* spp.

*Cryptococcus* spp.

*Neisseria* spp.

*Hemophilus influenzae*

Human T-lymphotropic virus

*Influenza* viruses

Mucormycetes

*Paracoccidioides* spp.

Parvovirus B19

*Streptococcus pneumoniae*

*Talaromyces* spp.

*Cyclospora cayatanensis*

*Ancylostoma* spp.

*Trichuris* spp.
